**Supplemental Table 2**

Non-coding variants that are covered by the NGS analysis

| Gene    | Position        | Nucleotide change   | Transcript     |
|---------|-----------------|---------------------|----------------|
| ADSL    | Chr22:40742514  | c.-49T>C            | NM_000026.2    |
| ALDH3A2 | Chr17:19561044  | c.681-14T>A/G       | NM_001031806.1 |
| ALDH7A1 | Chr5:125907053  | c.696-502G>C        | NM_001182.4    |
| AMT     | Chr3:49459938   | c.-55C>T            | NM_000481.3    |
| ARG1    | Chr6:131901748  | c.306-611T>C        | NM_000045.3    |
| ARSA    | Chr22:51064121  | c.1108-12C>G        | NM_000487.5    |
| BTD     | Chr3:15687154   | c.*159G>A           | NM_000060.2    |
| CACNA1A | Chr19:13341036  | c.5404-13G>A        | NM_001127221.1 |
| CASR    | Chr3:121994640  | c.1378-19A>C        | NM_001178065.1 |
| CDKL5   | ChrX:18525053   | c.-162-2A>G         | NM_003159.2    |
| CLN3    | Chr16:28497984  | c.461-13G>C         | NM_000086.2    |
| COL4A1  | Chr13:110802675 | c.*35C>A            | NM_001845.4    |
| COL4A1  | Chr13:110802678 | c.*32G>T            | NM_001845.4    |
| COL4A1  | Chr13:110802679 | c.*31G>T            | NM_001845.4    |
| D2HGDH  | Chr2:242680425  | c.293-23A>G         | NM_152783.3    |
| DARS2   | Chr1:173797449  | c.228-21_228-20insC | NM_018122.4    |
| EIF2B5  | Chr3:183855941  | c.685-13C>G         | NM_003907.2    |
| ETFDH   | Chr4:159593534  | c.-75A>G            | NM_004453.2    |
| FGF12   | Chr3:191857076  | c.*4722T>C          | NM_021032.4    |
| GABRA1  | Chr5:161274418  | c.-248+1G>T         | NM_000806.5    |
| GABRB3  | Chr15:27020313  | c.-2204G>A          | NM_000814.5    |
| GABRB3  | Chr15:27020399  | c.-2290T>C          | NM_000814.5    |
| GALC    | Chr14:88459917  | c.-74T>A            | NM_001201402.1 |
| GAMT    | Chr19:1399508   | c.391+15G>T         | NM_138924.2    |
| GCDH    | Chr19:13010271  | c.1244-11A>G        | NM_000159.3    |
| GJC2    | Chr1:228337558  | c.-170A>G           | NM_020435.3    |
| GJC2    | Chr1:228337561  | c.-167A>G           | NM_020435.3    |
| GJC2    | Chr1:228337709  | c.-20+1G>C          | NM_020435.3    |
| GRN     | Chr17:42422701  | c.-9A>G             | NM_002087.2    |
| GRN     | Chr17:42422705  | c.-8+3A>T           | NM_002087.2    |
| GRN     | Chr17:42422707  | c.-8+5G>C           | NM_002087.2    |

|          |                 |                                       |                |
|----------|-----------------|---------------------------------------|----------------|
| L2HGDH   | Chr14:50735527  | c.906+354G>A                          | NM_024884.2    |
| MOCS1    | Chr6:39874534   | c.*365_*366delAG                      | NM_005943.5    |
| MTHFR    | Chr1:11850973   | c.1753-18G>A                          | NM_005957.4    |
| MTHFR    | Chr1:11863212   | c.-13-28_-13-27delCT                  | NM_005957.4    |
| NDUF6    | Chr8:96046914   | c.298-768T>C                          | NM_152416.3    |
| NDUFS7   | Chr19:1386643   | c.17-1167C>G                          | NM_024407.4    |
| NUBPL    | Chr14:32319298  | c.815-27T>C                           | NM_025152.2    |
| OFD1     | ChrX:13768358   | c.935+706A>G                          | NM_003611.2    |
| OFD1     | ChrX:13773245   | c.1130-22_1130-19delAATT              | NM_003611.2    |
| PLP1     | ChrX:103042405  | c.454-322G>A                          | NM_000533.3    |
| PLP1     | ChrX:103042413  | c.454-314T>A/G                        | NM_000533.3    |
| PNKP     | Chr19:50364799  | c.1387-33_1386+49delCCTCCTCCCCTGACCCC | NM_007254.3    |
| POLR3A   | Chr10:79769273  | c.1909+22G>A                          | NM_007055.3    |
| POLR3A   | Chr10:79769277  | c.1909+18G>A                          | NM_007055.3    |
| POLR3B   | Chr12:106804589 | c.967-15A>G                           | NM_018082.5    |
| POLR3B   | Chr12:106831447 | c.1857-12A>G                          | NM_018082.5    |
| PPT1     | Chr1:40539203   | c.*526_*529delATCA                    | NM_000310.3    |
| PPT1     | Chr1:40558194   | c.125-15T>G                           | NM_000310.3    |
| PSAP     | Chr10:73583679  | c.778-26C>A                           | NM_001042465.1 |
| PTS      | Chr11:112098994 | c.84-323A>T                           | NM_000317.2    |
| PTS      | Chr11:112099026 | c.84-291A>G                           | NM_000317.2    |
| PTS      | Chr11:112100215 | c.164-716A>T                          | NM_000317.2    |
| QDPR     | Chr4:17500790   | c.436+2552A>G                         | NM_000320.2    |
| RNASEH2B | Chr13:51501530  | c.65-13G>A                            | NM_024570.3    |
| SCN1A    | Chr2:166848946  | c.4820-14T>G                          | NM_006920.4    |
| SCN1A    | Chr2:166854699  | c.4306-14T>G                          | NM_006920.4    |
| SCN1A    | Chr2:166908215  | c.964+14T>G                           | NM_006920.4    |
| SCN1A    | Chr2:166913031  | c.384-21T>A                           | NM_006920.4    |
| SLC19A3  | Chr2:228560811  | c.980-14A>G                           | NM_025243.3    |
| SLC2A1   | Chr1:43395462   | c.680-11G>A                           | NM_006516.2    |
| SOX10    | Chr22:38379877  | c.-84-2A>T                            | NM_006941.3    |
| SOX10    | Chr22:38412215  | c.-31954C>T                           | NM_006941.3    |
| TBCD     | Chr17:80851411  | c.1564-12C>G                          | NM_005993.4    |

|      |                |               |             |
|------|----------------|---------------|-------------|
| TPP1 | Chr11:6637752  | c.887-18A>G   | NM_000391.3 |
| TSC2 | Chr16:2098067  | c.-30+1G>C    | NM_000548.3 |
| TSC2 | Chr16:2110656  | c.976-15G>A   | NM_000548.3 |
| TSC2 | Chr16:2127477  | c.2838-122G>A | NM_000548.3 |
| TSC2 | Chr16:2138031  | c.5069-18A>G  | NM_000548.3 |
| ZEB2 | Chr2:145274987 | c.-69-1G>A    | NM_014795.3 |
